# Supplementary material for: Modulation of Diacylglycerol-Induced Melanogenesis in Human Melanoma and Primary Melanocytes: Role of Stress Chaperone Mortalin
Source: Hindawi journal article supplement (doi:10.1155/2019/9848969), 2019-04-14
Supplement: f1 [file 9848969.f1.pdf]

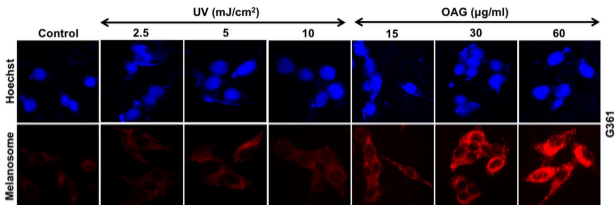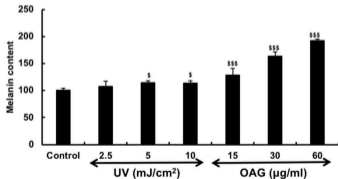

Supplementary Fig. 1

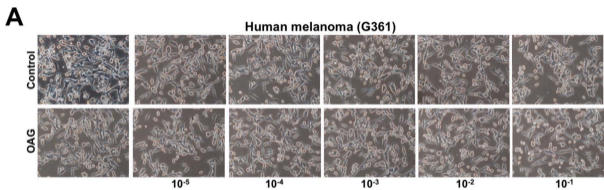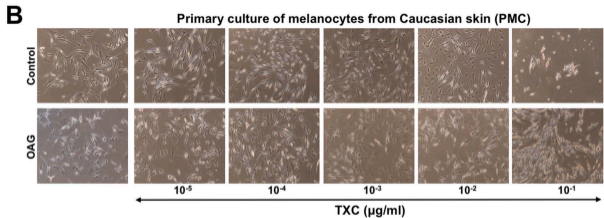

Supplementary Fig. 2

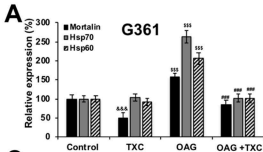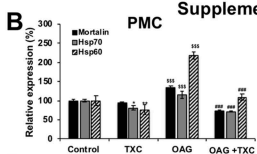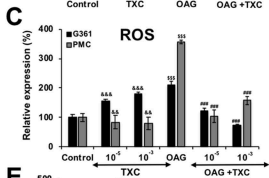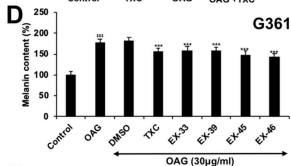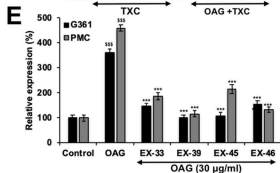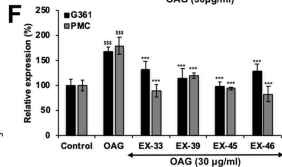

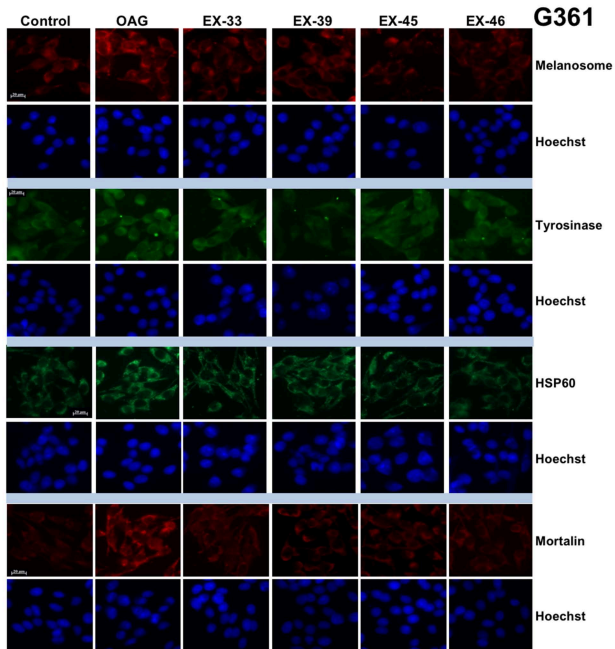

**Supplementary Fig. 4**

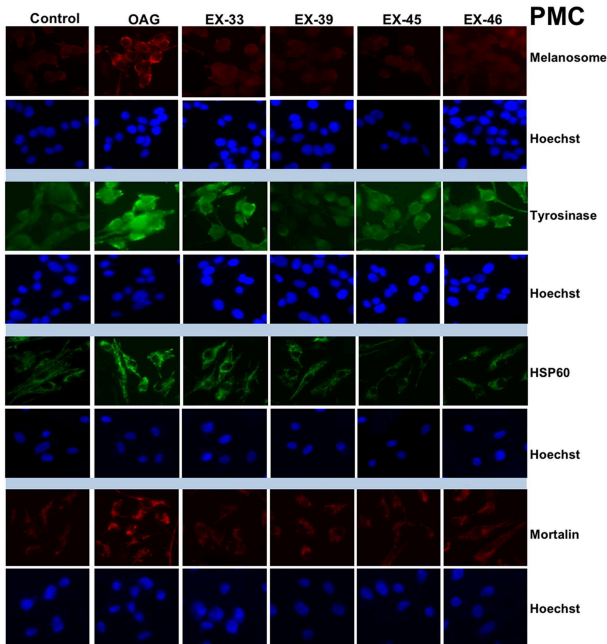

Supplementary Fig. 5

**Supplementary Table 1. Extracts and Ingredients Tested for Their Effect on OAG-induced Melanogenesis**

| Sr. Number | Reagent ID | Name                              | Sr. Number | Reagent ID | Name                                                                                 |
|------------|------------|-----------------------------------|------------|------------|--------------------------------------------------------------------------------------|
| 1          | R-01       | Hyperoside                        | 21         | R-21       | Embelin                                                                              |
| 2          | R-02       | Quercetin 4'-glucoside            | 22         | R-22       | Trans-4-(Aminomethyl) cyclohexanecarboxylic acid hexadecyl ester hydrochloride (TXC) |
| 3          | R-03       | Licochalcone A                    | 23         | R-23       | Tetraethylene glycol (TTEG)                                                          |
| 4          | R-04       | Xanthohumol                       | 24         | R-24       | Pentaethylene glycol (PEG)                                                           |
| 5          | R-05       | Luteolin                          | 25         | R-25       | Triethylene glycol dimethyl ether (TEGdmE)                                           |
| 6          | R-06       | Tectorigenin                      | 26         | R-26       | Triethylene glycol monobutyl ether                                                   |
| 7          | R-07       | 5,7-Dimethoxyflavone              | 27         | R-27       | Creatine                                                                             |
| 8          | R-08       | Tectorigenin 7-o-xylosylglucoside | 28         | R-28       | Epolactaene                                                                          |
| 9          | R-09       | Daidzein                          | 29         | R-29       | Trifluoromethoxy carbonylcyanide phenylhydrazone                                     |
| 10         | R-10       | Soyasaponin I                     | 30         | R-30       | Tetraethylene glycol dimethyl ether                                                  |
| 11         | R-11       | Soyasapogenol A                   | 31         | R-31       | Triethylene glycol dimethacrylate                                                    |
| 12         | R-12       | Ginkgolide A                      | 32         | R-32       | Tetraethylene glycol dimethacrylate                                                  |
| 13         | R-13       | Glycyrrhizinic acid               | 33         | EX-33      | <i>Glycyrrhiza glabra</i> extract                                                    |
| 14         | R-14       | Deacylgymnemic acid               | 34         | R-34       | Tranexamic acid (TXA)                                                                |
| 15         | R-15       | Ganoderic acid A                  | 35         | EX-35      | Tea flower extract                                                                   |
| 16         | R-16       | Corosolic acid                    | 36         | EX-36      | Mushroom extract                                                                     |
| 17         | R-17       | Bilobalide                        | 37         | R-37       | Rucinol                                                                              |
| 18         | R-18       | Verbascosid                       | 38         | EX-39      | <i>Prunus mume</i> extract                                                           |
| 19         | R-19       | Geniposide                        | 39         | EX-45      | <i>Scutellaria baicalensis georgi</i> extract                                        |
| 20         | R-20       | 6-Gingerol                        | 40         | EX-46      | <i>Camellia sinensis</i> extract                                                     |
